# Supplementary material
Source: publisher figshare collection journal article supplement (https://gsajournals.figshare.com/ndownloader/files/13238876)
Supplement: Supplementary file 1 [file 13238876]

>Pcit1_c_124(SRR341928_contig_124:123-629(+))
MSTQIFLVLSAVFVLFTINSSITYGAPSSPVYTYNVTVKTASAKFDDHNGKLKMSIMYRN
GTKSNQEDILLTPDDINIARDRTYNSTIASFAPLANITSVYLRWTLKSPYNPKYVFSKPS
IYFDPIAISYKFFDPYLHSTVIQSRRFCPPTSPVAIKHSDGANFFPCA
>Pcit1_c_15295(SRR341928_contig_15295:41-484(+))
MMTYQVLAFALAIVFVANISHIAGVAQVFNYNVTVKTSGSTKFSDHDGKLKLSVISTNGT
KVSQADFVLTPNDVNLAMNRNYTSLIASFAPLNNITSVYLRWTLSSPYNPYYAIKKPSIF
FDPIVFVYNYVDPRTHISSKMSRKFCPP
>Pcit1_c_18540(SRR341928_contig_18540:3-398(+))
GKFKIDMKGKDAAGKNFSHYIVLNPDGDEIKFNKSYSFPAAAQYPIENITDVHLRWTLKS
PFNPIYLINKPKVYFDRITLQANQLERGITTLSTRIYCGKKRKPVGIRHDEGELFETCLP
VPLYPIPGLTA
>Pcit2_c_10570(Pcit_ERR044692_fastq_contig_10570:463-23(-))
MKFLLFLIVSIALVQLSLAQFNVFNVTVYMGTNFDAQEGKLKMKFYPEKEEMVLSRDDER
LNPGQIYRYQVNYNDKINNITGVKLRWTLKSPYNPFKKHSINVNSVQVEGWASSPYGMSK
MVRNFCAKERPIKIAHKDSAAFQRFC
>Pcit2_c_14618(Pcit_ERR044692_fastq_contig_14618:24-443(+))
MIKQLTTISLILFVSFIILISVDVTISSPVYNYNVTIKTSGSPKFESHQGKLKMNILYQS
ESGTSQEDFVLTPVDVKIEPNREYQSTIASFSPMANITSIYLRWTLASPYNPIYKIKKPV
VYFDSITLTHINSDSAIHMT
>Pcit2_c_19047(Pcit_ERR044692_fastq_contig_19047:2-481(+))
MKLFLFLVFLTVAVKLNSAQNILNVTVLMGTSFDHQEGKLKLKFYPEKDEVVLSKDDERL
NPGQIYHYQINYNEKINEITGVKLRWTLKSPYNPFKKHVIKVNTVSVEGFGINPFNGATN
KVQKIFCAKDKPVKLEHKEAVAFQRHR
>Pcit2_c_21578(Pcit_ERR044692_fastq_contig_21578:308-3(-))
SVKTADKKFDSHEGKLKLAIMSTNTKKTTPEDFVLTPNDIKIKKDRTYTATVASIAPLNN
ITSVYLRWTLASPYNPYYAIKKPTIYFDSVTLSTSIVNPYTH
>Pcit2_c_2854(Pcit_ERR044692_fastq_contig_2854:470-3(-))
MSNQLLSTFTTIFVLVTINSFLVDESSAAATTFAYNVTVKTASTKFDEQKGNLKLSILYK
DGNKNPQEEFKLTQDDVTISMSRAYNSVISSFAPLGNITSIYLRWTLAAPYNPIYLISKP
TIYFDPIVLSNTFTDASTHLTINQVRKFCAPTSPVA
>Pcit2_c_4588(Pcit_ERR044692_fastq_contig_4588:780-256(-))
MLFTIKTISMLIVVITFTWLNVIVTTEAFAQYYSYNVTIKTSSAIKFSEHKGKIKIDINY
TNSAIKSISTGKEHFTLTPNDVKIAMNRNYTSQIYSFVPLANISSIDLRWTLKSPYNPIY
LMSTPIIYFDPILISHNYNDPNSHLIVTLVSKYCPITTPIGIKHKSKSTFYPCK
>Pcit2_c_987(Pcit_ERR044692_fastq_contig_987:765-232(-))
MNNLNCFIAFVIIISTLYETCNANIYGYNVTVFTTSDKDKKFDSVTGKFKIDLKGKDSAG
KNFSHYIVLNPDGDEIKFNRSYSYPAGASYPLENITDVNLRWTLKSPFNPIYLVNKPKVY
FDRITIQGNQAERGISTQSVRIYCGSKRKAVGIKHDEAEVFVTCLPLPLYPIPGLTV
>Pulm_c_00301(Contig_00301:365-3(-))
MSNQLLSTFTTIFVLVTINSFLIDESSAATTFAYNVTVKTASTKFDEQKGNLKLSILYKD
GNKNPQEEFKLTQDDVTISMSRVYNSVISSFAPLGNITSIYLRWSLAAPYNQIYLISKPT
I
>Pulm_c_00962(Contig_00962:794-270(-))
MLFTIKTISMLIVVTTFTWLNIIVTTQAVNQYYSYNVTIKTSSAIKFSDHKGKIKIEINY
TNSSIKSVKVGKESFTLTPNDVEIAMNRNYTSQIYSFVPLTNISSIDLRWTLKSPYNPIY
LMSKPIIYFDPILISHNYNDPNSHLIVTLVSKYCPVTTPIGIKHKNKSTFYPCK
>Pulm_c_00990(Contig_00990:1298-963(-))
EFRRVLFQSIKFNRSYSYPAGASYPLENITDVNLRWTLKSPFNPVYLINKPKVYFDRITI
QGNQAERGISTQSVRIYCGSKRKAVGIKHDEAEVFVTCLPLPLYPIPGLTV
>Pulm_c_02495(Contig_02495:2587-2171(-))
MSTQLFLVLSAVFVLFTINSSITYGAPTSLVYTYNVTVKTASTKFDDHNGKLKLSIMYKD
GTKTGQEDVLLTPDDINIDRDRTYNSTFAFFAPLGNITSVYLRWTLKSPYNPKYVFSEPS
TYFDPIGFSYKFFDTNLL
>Pulm_c_13691(Contig_13691: 397-678)
LKTTTTTTTINRDVKIEPNHEYQSTIASFSPMVNITSIYLRWTLASPYNPIYKIRKPIVY
FDSITLTHINSDSAIHMTITQSRRYCSPVSPIAIKHADGNTFYPCV
>Pulm_c_19488(Contig_19488:690-79(-))
MNNLILISVTIFIQIIIVTINCSVINNQLNEELYVLYGEGTTVYLYNLTVFTSSNLSEQF
EPINGKFPIYIGLNLDKQFNPNNLVQLDHPSNLIKFNETYHFIFSSKYSLENITNINIKL
TTDETINFNCFYLDKIVIQLITEKIPIPTKIFCKNKNQPIKVDSETIKSIEKCDIGPLEQ
LTWLNLDNPSRINVNYVPMVNLN
>tetur02g03490
MSSRYFVCIPLAFIVLSCISIWSTDGVSQIYNYNVTVQTAGSPKFDDHDGKLKIKLLYKT
ETATSEEDFVLTPNAVKIEPNHHYESTIASFGSLVNISSIYLRWTLASPYNPIYKIKKPS
IYFDSLSLTQINSDSSDYITTIKKRRFCPPVFPVGIKHSDGATFYPCI
>tetur02g12320
MNNFYCILIFLFVISSLHEVCNANIYGYNVTIVTSSDKDRKFDSVTGKFKIDMKGKDAAG
KNFSHYIVLNPDGDEIKFNKSYSFPAAAQYPIENITDVHLRWTLKSPFNPIYLINKPKVY
FDRITLQANQLERGITTLSTRIYCGKKRKPVGIRHDEGELFETCLPVPLYPIPGLTA
>tetur02g15207
MKNIIFVTIYVLVLNLVHSSVIRDDELYIIYEKVYLYNVTLFTTSDPSKKFESVEGQFLI
NLEGNTDSTFDVNNYLPLDQKSNSISFNESYMFLLTTTHSLETINKISIKWTGNDHAMYL
NHTVYVDKIVLQLVTERIPIPTKIFCGQNDKPTALEPDKGELMTQCSFGPLNWIPWLNFN
IPSNIKANLVQLHIVQH
>tetur06g03010
MADKEFDSHEGKLKISVTSKNAQNTTQEDFELTPNDVEMKKDKNYTAIISSTAPLDTITS
VYLQWTREAPNDTDSASNKPTLYFESVSLTSFKFRPHPDFCICVSRYFCPETTPIGIEHA
GGATFNFCNSRKVFSLYRYYEVRSVKDLKEAECSM
>tetur06g03050
MNSKMLFAFVLAANICAITVTAEVYSYKVNVRMADKEFDSHEGKLKISVTSKNAQNTTQE
DFELTPNDVEMKKDKNYTAIISSTAPLDTITSVYLQWTREAPNDTDSASNKPTLYFESVS
LTSFKFRPHPDFCICVSRYFCPETTPIGIEHAGGATFNFCNSRKVFSLYRYYEVRSVKDL
KEAECSM
>tetur11g05440
MMTYQVPAFALAIFFVAAISHIANADQVFNYDVTVQTSGSTQFSAHDGKLKLSVVKMGGK
TQEDFVLTPNDVNLTMNSEYTGQITSSIELEDIKSVYLQWTLATPYNPYFAIKKPSIYFD
QIVFGYKYRAMTYRTHINMKKLQKFCPPTQPIGIEHADGASFNACGPIIRQVLPF
>tetur11g05720
MMTYQVSAFALAIVFFANISYIVNADQAFYYNVAVQTSGSTKFSAHEGKLKLSVVRIGEE
TTEDFILTPRAVNLTMNSRYTGEIKSSIGLANIKSVYLSWTLATPNSPDFATEKPSIYFD
EIVLEYWYTTSVPAVIYGYPKQIEGHRLQKFCPSTQPIGIEHANGASFHACGPMVEQTY
>tetur11g05730
MMTYQVSAFALAIVFFANISYIVNADQAFYYNVAVQTSGSTKFSAHEGKLKLSVVRIGEE
TTEDFILTPRAVNLTMNSRYTGEIKSSIWFPNIKSVYLSWTLATPNSPDFATAKPSIYFD
EIVLEYWYTTSEPVIYGYPERINRHRLQKFCPPTQPIGIAHADGASFHACGPMVIEQTY
>tetur11g05740
MMTYQVSAFALAIVFVANISYIVNAYEVFNYDVTVQTSGSTKFSAHDGKLKLSVVRIGEE
TSEDFVLTPRDVNLAMNSEYTGQIASSIELEDIKSVYLSWTLAKPNSPDFAIEKPSIYFD
HIVFDYKYKEWIYRGQQKLQKFCPPTQPIGIEHADGASFNACGPMVERIIY
>tetur15g01400
MDSKILFFCVLIVNIYLITDANQVFNYVVTIKTADNKFSSHEGKLNLDILSSNGLTSSQE
DFELTPNGVKLAKNHVYTANIASFSPLDNITSVYLGWNLVSNYNLFYKIKKPMVYFDPIT
IGTTYDDPNSHMSVTLNRKFCPTTLPIGIKSGKGASFHPCISN
>tetur15g01410
MISRIFLCFVLTLIVCVAVEAVQVYNYNVTVKTADSPNFSSHKGKLKLAVFSIDQYAKSR
EDYVLTPYNVKLAKSHFYTASIASFASLKNMTSVYLRWTLASPYNPYYLMKKPSIYFEPI
IFNSTYIDPKTHMLVTKSRKFCPLTTPVQIKHGNGSSFYPCV
>tetur22g02110
MNSKTLFAFVLVNICIITVTAQVYNYGVTVRTASKKFDSHDGKLKLSITSPNSDNSKKNT
AQEFVLTPNDIKIKREKIYTATISSIAPLQNITSVYLRWTLASPYNPYYAINKPKIYFDS
VTLSTATLNPYTHLASSESRKFCPTTIPIGIKHADGATFNSCF
>tetur22g02120
MNSKIFLAFVLAVNLYVVIDAAQVFSYEVTVKTADKKFDSHEGKLKLSVMSYDSKKTSQE
DFVLTPTDVKIKKDRTYTAAIASFAPLNNITSVYLRWTLASPFNPYYAIKKPKIYFDSVT
LTTSIVNPYTHVASSQSRKFCPEKIPIGIKHADGATFNSCI
>tetur22g02130
MNSKIFFAFFLAVYICIITVNAQVYSYGVSVKTADKEFGSQKGKIKLAIMSTNTVKTTQE
DFVLTPNDIKIKKDRTYTATVSSIAPLNNITSVYLRWTLASPYNPYYAIKKPTIYFDSVT
LSTSIVNPYTHLAVSQSCKFCPATTPIGIKHADGATFNSCI
>tetur22g02150
MNSKIIFAFILAVNICTITTAQVYSYKVAVSTAYREFDSHEGKLKLSVMSNDTNKITRED
YLLTPNDVELKRDSTYTAKISSIAPLDHITSVYLRWTLATPNNTAYATKKPTIYVNPVKL
KMFTLLPLPSFSPCEIHIFYPETFPIGITNEDEANFKFGHIETDWIYYYRTPNVSRIDAD
C
>tetur22g02170
MNSKILFAFVLAVNICIITATAKVYTYGVIVRTANKDFESHEGKLKLSVISNNTNKITQE
DFELTPNDVEIMQANKYATTISSFAPPDKITSVYLRWTLSQPDNPYNAIEKPTVYFKSVN
LNFFEFRQDPQWSPCTSYKFYPETIPIGIKHADGAIFNYYDEETTFKFYKQNVSVLDAEC

>tetur22g02180
MNAKILFAFVLAVNICIITATAQVYSYSVSVKTADKEFSSHDGKIKISVLSSDSVKTSQE
DFVLTPNDIEIKKDETYNYAIPLIAPLENITSVYLRWTLASPYNPYYAIKKPKIYFDSVT
LVSTYIVPFIHQIGSKNRKFCPETIPIGIEHADGATFNPCT
>tetur22g02200
MNSKILLAFVLAVNICVIIDAAQVYSYEVIVKTADKKFSSHDGKIKISVLSSDSVKTSQE
AFVLTPTDVKIKQDKTYTATISSVAPLNNITCVYLRWSLASPYNPVYAVKKPVIYFDPII
VSNSVVDPNTQISVSASRKFCPATIPIAIKHADGASFDACT
>tetur22g02530
MMTYQVLAFALAIVFVANISHIAGVAQVFNYNVTVKTSGSTKFTDHDGKLKLSVISTNGT
KVSQADFVLTPNDVNLAMNRNYTSLIASFAPLNNITSVYLRWTLSSPYNPYYAIKKPSIF
FDPIVFVYNYIDPRTHISSKLSRKFCPPTQPIGIKHSDGASFYPCV
>tetur46g00010
MMTYQVSAFALAIVFVANISYIANADQVFNYDVTVHTSGSTKFSAHDGKLKLTVVKSSGK
TQEDFVLTPNDVNLTMNSKYTGQIASSVELEDIKSVYLQWTLATPYNPYFAIKKPSIYFD
LIVFGYKYKAMAYRTHINMQKVQNFCPSTQPIGIEHADGASFNACGSIIRQVLPF
>Tev_c18668(Tevansi_VICOSA_c18668:91-582(+))
MDLKILLFCILIVDIYLITDANQVFSYVVTIKTAAVRFCSHEGKLKLDILNSDGLTYSQE
DFELTPNGVKLAKNHVYTANIGSFSPLDNITSVYLGWDLASPLNLFFKIFKPTIYFDSIT
IGTTHGDPNTYMSVTLSRKFCPKISPVGIKHGSAAYFYPCNLN
>Tev_c2026(Tevansi_VICOSA_c2026:137-511(+))
MSSRYFVCIPLAFIVLSCINIWSTDGIPQKIYNYNVTVQTAGSPKFDGHDGKLKIKLLYK
TETATSEEDFVLTPNAVKIEPNQHYESTIASFGSLVNISSIYLRWTLASPYNPIYKIKKX
MHLF
>Tev_c2139(Tevansi_VICOSA_c2139:119-586(+))
MKSIIFATIYVLVLNIVHSSVIKDDELYIIYEKGQSVYLYNVTLFTTSDPSKKFETVEGQ
FLINLEGNTDSTFDINNYLPLDQKSNSISFNESYMFLLTTTHSLETINNISIKWTGNDNL
MPLNHTVYVDRVVLQLVTERIPIPTRIFCGQNDKPA
>Tev_c2224(Tevansi_VICOSA_c2224:87-551(+))
MISRLFLALVLTLIICVTVEAVQVYNYNVTVKTADSPDFSSHKGKLKLAVFSTDQFAKSR
EDYVLTPSNVKLSKGHFYTGNIASFASLKNMTSVYLRWTLASPYNPYYLIKKPSIYFDPI
ILNSTYIDPNTHMLVTKSKKFCPPTKPVKIKHGDG
>Tev_c24(Tevansi_VICOSA_c24:2-574(+))
MNSKILLAFVVTVNICILIDAAQVYSYEVTVKTADKKFSAHDGKIKLAVVSSGTNKTLEE
EFVVTPNDVKIKQDKTYIATISSAAQLNSITSVYLRWTLASPYNPVYAIKAPVIYFDPII
VSRTYVDPNTHISVSASRKFCPTTIPIGIKHAGGATFNACT
>Tev_c3061(Tevansi_VICOSA_c3061:78-521(+))
MIKLSTAQVLAFALAIVYVTNISYISGIAVFNYNVTVKTAATKFTDHDGKLKLSVLSTNG
KKSTQEDYVLTPDDVNLAMNRNYTALITSSASLNNITSVYLRWTLATPYNPYYAIKKPSI
FFDPIFLTYNSVDPMTHISIAQRRKFCP
>Tev_c701(Tevansi_VICOSA_c701:112-648(+))
MNSFYCALIFLFVISSLHETCNATVYGYNVSIITSSDKDRKFDSVXWKXXKIDLKGKDAF
GKNFSHYIVLNPDGDEIKFNKSYSFPAAAQYPIENITEVFLRWTLKSPFNPIYLINKPKV
YFDRIELQANQLERGITTLSTRIFCGKKRKPVGIKHDEGELFETCLPVPLYPIPGLTG
>Tev_c8327(Tevansi_VICOSA_c8327:1-582(+))
MNSKILLAFVVAVSVCVIIDAAQVYSYGVSVQTANKKFDSHEGKLKLSVISTDTRKTNQE
DFVLTPKDVKIKKDKTYTAAIASLAPLNNITSVYLRWTLASPYNPYYAIKKPKIYFDSVT
LSTSIINPYTHLATTQSRKFCPLTTPIGIKHADGATLILVCE
